# Supplementary material for: A Circulating Proteomic Signature of Allostatic Load Predicts Multisystem Disease and Mortality
Source: Research Square preprint supplement (doi:10.21203/rs.3.rs-8881432/v1), 2026-04-16
Supplement: Supplementary file 1 [file f1a5f62ea46fb261a87e3f9b.xlsx]

## Sheet: Table1-SES&Lifestyle
Table S1 Sociodemographic and lifestyle determinants of AL and ProAL50 (N=37089)
		AL		ProAL50
	N(%)	Coefficient(95%CI)	Pvalue	Coefficient(95%CI)	Pvalue
Age
<=57	16919(45.62)	Ref		Ref
>57	20170(54.38)	0.65(0.61,0.68)	<0.001	0.12(0.11,0.13)	<0.001
Gender
Female	19468(52.49)	Ref		Ref
Male	17621(47.51)	0.98(0.95,1.01)	<0.001	0.25(0.24,0.26)	<0.001
Race
White	34671(93.48)	Ref		Ref
Black	758(2.04)	0.09(-0.03,0.20)	0.15	-0.05(-0.07,-0.03)	<0.001
Asian	850(2.29)	0.23(0.12,0.34)	<0.001	0.06(0.04,0.07)	<0.001
Mix or others	688(1.85)	-0.08(-0.20,0.04)	0.21	-0.02(-0.04,-0.01)	0.03
Income
<=30999	15473(41.72)	Ref		Ref
>30999	16116(43.45)	-0.19(-0.23,-0.15)	<0.001	-0.03(-0.04,-0.02)	<0.001
Education
High school or less	16416(44.26)	Ref		Ref
College or professional	13940(37.59)	-0.22(-0.26,-0.18)	<0.001	-0.03(-0.04,-0.02)	<0.001
Townsend
Low	18213(49.11)	Ref		Ref
High	18826(50.76)	0.09(0.05,0.12)	<0.001	0.02(0.01,0.03)	<0.001
Smoke
Never	20158(54.35)	Ref		Ref
Previous	12855(34.66)	0.17(0.14,0.21)	<0.001	0.03(0.02,0.04)	<0.001
Current	3959(10.67)	0.14(0.09,0.20)	<0.001	0.06(0.05,0.07)	<0.001
Alcohol
Never	7461(20.12)	Ref		Ref
Moderate	13568(36.58)	-0.21(-0.25,-0.16)	<0.001	-0.05(-0.06,-0.04)	<0.001
Heavy	16026(43.21)	-0.27(-0.31,-0.22)	<0.001	-0.07(-0.09,-0.06)	<0.001
Physical activity
Low	5851(15.78)	Ref		Ref
Moderate	12032(32.44)	-0.29(-0.34,-0.24)	<0.001	-0.06(-0.07,-0.05)	<0.001
High	12115(32.66)	-0.48(-0.53,-0.43)	<0.001	-0.10(-0.11,-0.09)	<0.001
Sleepless
Never	8964(24.17)	Ref		Ref
Sometimes	17624(47.52)	0.10(0.06,0.14)	<0.001	0.02(0.01,0.03)	<0.001
Usually	10467(28.22)	0.22(0.17,0.26)	<0.001	0.04(0.03,0.05)	<0.001

## Sheet: TS1-AL Cutoff
Table S1-AL Cut off
Variable	Cut off Value
Waist to hip ratio	>=0.85 for female, >=0.9 for male
Pulse rate	>100
SBP (mm Hg)	>=140
DBP (mm Hg)	>=90
HDL (mmol/L)	>1.3 for female, >1 for male
LDL ( mmol/L)	>3.4
Total Cholesterol(mmol/L)	>5.2
Triglycerides(mmol/L)	>=1.7
C-reactive protein( mg/L)	>3
Creatinine(umol/L)	>97.2 for female, >114.9 for male
Glycated hemoglobin (HbA1c)mmol/mol	>48
Medication history	Yes

## Sheet: TS2-General&Mental Health
Table S2 Associations with General and Mental Health
		AL			ProAL50
	N(%)	Coefficient(95%CI)	Pvalue	FDR	Coefficient(95%CI)	Pvalue	FDR
Slow walking pace
Slow	3289(8.87)	Ref			Ref
Average	19429(52.38)	-0.51(-0.57,-0.45)	<0.001	<0.001	-0.09(-0.10,-0.08)	<0.001	<0.001
Brisk	14101(38.02)	-0.90(-0.97,-0.84)	<0.001	<0.001	-0.16(-0.17,-0.15)	<0.001	<0.001
Overall health rating
Poor	1876(5.06)	Ref			Ref
Fair	7943(21.42)	-0.21(-0.29,-0.13)	<0.001	<0.001	-0.04(-0.06,-0.03)	<0.001	<0.001
Good	21051(56.76)	-0.72(-0.80,-0.64)	<0.001	<0.001	-0.13(-0.14,-0.12)	<0.001	<0.001
Excellent	6031(16.26)	-1.20(-1.28,-1.11)	<0.001	<0.001	-0.20(-0.22,-0.19)	<0.001	<0.001
Feeling tired/lethargic every day
Not at all	16675(44.96)	Ref			Ref
More than half the days	2284(6.16)	0.25(0.18,0.32)	<0.001	<0.001	0.05(0.04,0.06)	<0.001	<0.001
Several days	14532(39.18)	0.16(0.12,0.19)	<0.001	<0.001	0.03(0.02,0.04)	<0.001	<0.001
Nearly every day	2402(6.48)	0.38(0.31,0.45)	<0.001	<0.001	0.07(0.06,0.09)	<0.001	<0.001
ProAgeGap
<0	18843(50.80)	Ref			Ref
>=0	18246(49.20)	0.14(0.10,0.17)	<0.001	<0.001	0.04(0.03,0.05)	<0.001	<0.001
NLR
<3	29046(78.31)	Ref			Ref
>=3	7102(19.15)	0.12(0.08,0.16)	<0.001	<0.001	-0.006(-0.013,0.000)	0.06	0.06
Anxiety
negative	30859(83.20)	Ref			Ref
positive	3866(10.42)	0.20(0.15,0.26)	<0.001	<0.001	0.04(0.03,0.05)	<0.001	<0.001
Depression
negative	32480(87.57)	Ref			Ref
positive	2132(5.75)	0.15(0.08,0.23)	<0.001	<0.001	0.04(0.02,0.05)	<0.001	<0.001
Anxiety / Depression disorder
negative	31266(84.30)	Ref			Ref
positive	1947(5.25)	0.20(0.12,0.27)	<0.001	<0.001	0.04(0.03,0.05)	<0.001	<0.001

## Sheet: TS3-Risk of Disease 
Table S3 AL and ProAL50 in relation to incident overall cancer and chronic disease
	Overall Cancer(N=4498)
	Crude		Model1
	HRs(95%CI)	Pvalue	HRs(95%CI)	Pvalue	FDR
AL	1.11(1.10,1.13)	<0.001	1.04(1.02,1.06)	<0.01	<0.01
ProAL50(per SD)	1.23(1.19,1.27)	<0.001	1.06(1.03,1.10)	<0.001	<0.01
	Type-2 diabetes(N=3458)
AL	1.07(1.05,1.09)	<0.001	1.06(1.04,1.09)	<0.001	<0.001
ProAL50(per SD)	1.10(1.06,1.15)	<0.001	1.08(1.04,1.12)	<0.001	<0.001
	Cerebrovascular diseases(N=2090)
AL	1.02(0.99,1.04)	0.19	1.00(0.97,1.03)	0.95	0.98
ProAL50(per SD)	1.02(0.98,1.07)	0.34	0.98(0.93,1.03)	0.28	0.33
	Ischemic heart disease(N=4873)
AL	1.03(1.01,1.24)	<0.01	1.00(0.98,1.01)	0.52	0.67
ProAL50(per SD)	1.11(1.08,1.14)	<0.001	1.05(1.01,1.08)	<0.01	0.02
	Emphysema, COPD(N=2059)
AL	1.06(1.03,1.08)	<0.001	1.04(1.01,1.06)	<0.01	0.01
ProAL50(per SD)	1.11(1.06,1.16)	<0.001	1.08(1.02,1.13)	<0.01	<0.01
	Chronic liver diseases(N=833)
AL	1.01(0.97,1.05)	0.72	0.97(0.93,1.01)	0.12	0.18
ProAL50(per SD)	1.10(1.03,1.18)	<0.01	1.04(0.96,1.13)	0.29	0.33
	Chronic kidney diseases(N=2170)
AL	1.08(1.05,1.11)	<0.001	1.07(1.04,1.10)	<0.001	<0.001
ProAL50(per SD)	1.10(1.06,1.15)	<0.001	1.08(1.03,1.14)	<0.001	<0.001
	Alzheimer’s disease(N=465)
AL	1.04(0.98,1.10)	0.23	1.01(0.95,1.07)	0.77	0.88
ProAL50(per SD)	1.14(1.03,1.26)	<0.01	1.09(0.97,1.23)	0.14	0.21
	Parkinson’s disease and parkinsonism(N=641)
AL	0.96(0.92,1.01)	0.15	0.94(0.90,1.00)	0.02	0.03
ProAL50(per SD)	1.02(0.94,1.11)	0.6	1.02(0.93,1.12)	0.87	0.87
Model1:adjusted age,gender,race,edu,income,Townsend, employment, smoke,alcohol, physical activity, and sleep.

## Sheet: TS4-Common Cancer Risk
Table S5 Common Cancer Risk
	Breast Cancer(N=426)
	Crude		Model1
	HR(95%CI)	Pvalue	HR(95%CI)	Pvalue	FDR
AL	1.01(0.95,1.05)	0.95	0.99(0.94,1.05)	0.79	0.84
ProAL50(per SD)	1.06(0.98,1.15)	0.14	1.06(0.97,1.16)	0.22	0.42
	Bowel Cancer(N=426)
AL	1.17(1.11,1.23)	<0.001	1.08(1.02,1.15)	0.01	0.06
ProAL50(per SD)	1.34(1.23,1.50)	<0.001	1.18(1.05,1.32)	<0.01	0.02
	Lung Cancer(N=314)
AL	1.24(1.16,1.32)	<0.001	1.07(0.99,1.15)	0.08	0.28
ProAL50(per SD)	1.48(1.32,1.65)	<0.001	1.10(0.96,1.26)	0.17	0.42
	Kidney Cancer(N=92)
AL	1.30(1.16,1.46)	<0.001	1.20(1.06,1.37)	<0.01	0.03
ProAL50(per SD)	1.74(1.42,2.13)	<0.001	1.53(1.21,1.94)	<0.001	<0.01
	Prostate Cancer(N=858)
AL	1.07(1.02,1.11)	<0.01	1.02(0.98,1.07)	0.39	0.64
ProAL50(per SD)	1.03(0.96,1.11)	0.34	0.95(0.89,1.03)	0.22	0.42
	Pancreas(N=86)
AL	1.14(1.01,1.30)	0.04	1.05(0.91,1.22)	0.47	0.64
ProAL50(per SD)	1.25(1.00,1.56)	0.05	1.10(0.84,1.44)	0.48	0.54
	Cervix(N=112)
AL	1.28(1.15,1.43)	<0.001	1.25(1.11,1.40)	<0.001	<0.01
ProAL50(per SD)	1.50(1.25,1.79)	<0.001	1.43(1.15,1.74)	<0.001	<0.01
	Ovary(N=74)
AL	1.13(0.99,1.30)	0.08	1.03(0.89,1.21)	0.67	0.8
ProAL50(per SD)	1.31(1.05,1.65)	0.02	1.11(0.85,1.45)	0.44	0.54
	Bladder(N=76)
AL	1.20(1.06,1.37)	<0.01	1.00(0.87,1.16)	0.97	0.97
ProAL50(per SD)	1.65(1.32,2.07)	<0.001	1.14(0.87,1.49)	0.35	0.49
	Esophageal(N=70)
AL	1.28(1.12,1.47)	<0.001	1.07(0.92,1.25)	0.4	0.64
ProAL50(per SD)	1.67(1.31,2.12)	<0.001	1.14(0.86,1.52)	0.37	0.5
	Liver(N=42)
AL	1.19(1.00,1.42)	0.05	1.07(0.87,1.31)	0.51	0.64
ProAL50(per SD)	2.08(1.53,2.82)	<0.001	1.95(1.37,2.77)	<0.001	<0.01
	Brain (N=54)
AL	1.18(1.01,1.37)	0.04	1.07(0.90,1.27)	0.45	0.64
ProAL50(per SD)	1.36(1.04,1.79)	0.03	1.12(0.81,1.55)	0.5	0.54
	Non-Hodgkin lymphoma(N=157)
AL	1.16(1.06,1.27)	<0.01	1.09(0.98,1.20)	0.11	0.28
ProAL50(per SD)	1.32(1.13,1.55)	<0.001	1.18(0.97,1.43)	0.09	0.27
	Leukemia (N=87)
AL	1.01(0.89,1.15)	0.9	0.93(0.81,1.07)	0.32	0.61
ProAL50(per SD)	1.12(0.90,1.39)	0.3	0.98(0.75,1.27)	0.87	0.87
	Stomach(N=57)
AL	1.36(1.17,1.57)	<0.001	1.15(0.98,1.36)	0.09	0.28
ProAL50(per SD)	1.68(1.30,2.18)	<0.001	1.17(0.85,1.59)	0.33	0.5
Model1:adjusted age,gender,race,edu,income,Townsend, employment, smoke,alcohol, physical activity, and sleep.

## Sheet: TS5-Survival of Disease
Table S4 Associations with all-cause and cause-specific mortality
	All Cause(N=3650)
	Crude		Model1
	HR(95%CI)	Pvalue	HR(95%CI)	Pvalue	FDR
AL	1.28(1.26,1.31)	<0.001	1.11(1.08,1.13)	<0.001	<0.001
ProAL50(per SD)	1.68(1.62,1.73)	<0.001	1.25(1.20,1.30)	<0.001	<0.001
	Overall Cancer(N=1448)
	Crude		Model1
	HR(95%CI)	Pvalue	HR(95%CI)	Pvalue
AL	1.23(1.19,1.27)	<0.001	1.08(1.04,1.11)	<0.001	<0.001
ProAL50(per SD)	1.56(1.49,1.65)	<0.001	1.23(1.16,1.31)	<0.001	<0.001
	Type-2 diabetes(N=16)
	Crude		Model1
AL	2.72(1.97,3.75)	<0.001	2.67(1.86,3.81)	<0.001	<0.001
ProAL50(per SD)	4.04(2.47,6.63)	<0.001	3.89(2.16,7.00)	<0.001	<0.001
	Cerebrovascular diseases(N=79)
	HR(95%CI)	Pvalue	HR(95%CI)	Pvalue
AL	1.40(1.24,1.59)	<0.001	1.19(1.04,1.37)	0.01	0.03
ProAL50(per SD)	1.92(1.55,2.39)	<0.001	1.39(1.07,1.80)	0.02	0.03
	Ischemic heart disease(N=403)
	HR(95%CI)	Pvalue	HR(95%CI)	Pvalue
AL	1.57(1.48,1.66)	<0.001	1.32(1.24,1.40)	<0.001	<0.001
ProAL50(per SD)	2.32(2.10,2.55)	<0.001	1.62(1.45,1.82)	<0.001	<0.001
	Emphysema, COPD(N=125)
	HR(95%CI)	Pvalue	HR(95%CI)	Pvalue
AL	1.32(1.19,1.45)	<0.001	1.06(0.95,1.18)	0.49	0.49
ProAL50(per SD)	1.87(1.57,2.22)	<0.001	1.17(0.95,1.44)	0.23	0.27
	Chronic liver diseases(N=45)
	HR(95%CI)	Pvalue	HR(95%CI)	Pvalue
AL	1.56(1.33,1.84)	<0.001	1.35(1.13,1.61)	<0.001	<0.01
ProAL50(per SD)	2.92(2.21,3.86)	<0.001	2.32(1.69,3.19)	<0.001	<0.001
	Chronic kidney diseases(N=13)
	HR(95%CI)	Pvalue	HR(95%CI)	Pvalue
AL	1.96(1.43,2.67)	<0.001	1.79(1.27,2.51)	<0.001	<0.01
ProAL50(per SD)	3.61(2.15,6.04)	<0.001	3.16(1.75,5.71)	<0.001	<0.001
	Alzheimer’s disease(N=102)
	HR(95%CI)	Pvalue	HR(95%CI)	Pvalue
AL	1.11(1.00,1.24)	0.05	0.96(0.84,1.09)	0.42	0.47
ProAL50(per SD)	1.33(1.09,1.61)	<0.01	1.01(0.79,1.29)	0.94	0.96
Model1:adjusted age,gender,race,edu,income,Townsend, employment, smoke,alcohol, physical activity, and sleep

## Sheet: TS6-Common Cancer Survival
Table S6 Common Cancer Survival
	Breast(N=89)
	Crude		Model1
	HR(95%CI)	Pvalue	HR(95%CI)	Pvalue	FDR
AL	1.18(1.05,1.33)	<0.01	1.08(0.94,1.23)	0.29	0.52
ProAL50(per SD)	1.60(1.32,1.95)	<0.001	1.42(1.13,1.77)	<0.01	0.01
	Bowel(N=166)
	Crude		Model1
	HR(95%CI)	Pvalue	HR(95%CI)	Pvalue
AL	1.26(1.15,1.37)	<0.001	1.14(1.03,1.25)	<0.01	0.14
ProAL50(per SD)	1.78(1.53,2.07)	<0.001	1.56(1.30,1.86)	<0.001	<0.001
	Lung(N=241)
	HR(95%CI)	Pvalue	HR(95%CI)	Pvalue
AL	1.26(1.17,1.35)	<0.001	1.04(0.96,1.13)	0.34	0.52
ProAL50(per SD)	1.60(1.41,1.81)	<0.001	1.27(0.98,1.65)	0.2	0.35
	Kidney Cancer(N=32)
	HR(95%CI)	Pvalue	HR(95%CI)	Pvalue
AL	1.50(1.24,1.83)	<0.001	1.28(1.03,1.59)	0.03	0.21
ProAL50(per SD)	2.26(1.60,3.19)	<0.001	1.61(1.08,2.39)	0.02	0.06
	Prostate Cancer(N=145)
	HR(95%CI)	Pvalue	HR(95%CI)	Pvalue
AL	1.36(1.24,1.49)	<0.001	1.07(0.96,1.19)	0.21	0.52
ProAL50(per SD)	1.96(1.67,2.30)	<0.001	1.14(0.96,1.36)	0.15	0.31
	Pancreas(N=81)
	HR(95%CI)	Pvalue	HR(95%CI)	Pvalue
AL	1.16(1.02,1.31)	0.03	1.05(0.91,1.21)	0.54	0.64
ProAL50(per SD)	1.37(1.10,1.72)	<0.01	1.19(0.91,1.57)	0.2	0.35
	Cervix(N=24)
	HR(95%CI)	Pvalue	HR(95%CI)	Pvalue
AL	1.16(0.93,1.46)	0.19	1.14(0.88,1.47)	0.33	0.52
ProAL50(per SD)	1.13(0.76,1.69)	0.54	1.23(0.78,1.93)	0.38	0.39
	Ovary(N=42)
	HR(95%CI)	Pvalue	HR(95%CI)	Pvalue
AL	1.14(0.96,1.35)	0.13	1.15(0.95,1.39)	0.15	0.52
ProAL50(per SD)	1.18(0.87,1.60)	0.28	1.30(0.93,1.80)	0.12	0.3
	Bladder(N=26)
	HR(95%CI)	Pvalue	HR(95%CI)	Pvalue
AL	1.35(1.09,1.67)	<0.01	1.07(0.85,1.36)	0.56	0.64
ProAL50(per SD)	1.91(1.31,2.79)	<0.01	1.20(0.79,1.84)	0.39	0.39
	Esophageal(N=53)
	HR(95%CI)	Pvalue	HR(95%CI)	Pvalue
AL	1.29(1.11,1.50)	<0.001	1.05(0.88,1.24)	0.59	0.64
ProAL50(per SD)	1.79(1.38,2.34)	<0.001	1.17(0.85,1.59)	0.34	0.39
	Liver(N=37)
	HR(95%CI)	Pvalue	HR(95%CI)	Pvalue
AL	1.25(1.04,1.50)	0.02	1.10(0.89,1.35)	0.37	0.52
ProAL50(per SD)	2.54(1.85,3.49)	<0.001	2.36(1.65,3.37)	<0.001	<0.001
	Brain(N=53)
	HR(95%CI)	Pvalue	HR(95%CI)	Pvalue
AL	1.23(1.05,1.43)	<0.01	1.10(0.93,1.31)	0.28	0.52
ProAL50(per SD)	1.50(1.15,1.97)	<0.01	1.20(0.87,1.66)	0.26	0.39
	Non-Hodgkin(N=55)
	HR(95%CI)	Pvalue	HR(95%CI)	Pvalue
AL	1.22(1.05,1.42)	<0.01	1.11(0.93,1.31)	0.24	0.52
ProAL50(per SD)	1.91(1.47,2.48)	<0.001	1.79(1.32,2.43)	<0.001	<0.001
	Leukemia(N=35)
	HR(95%CI)	Pvalue	HR(95%CI)	Pvalue
AL	1.14(0.94,1.38)	0.18	0.97(0.78,1.20)	0.79	0.79
ProAL50(per SD)	1.21(0.86,1.69)	0.27	0.83(0.55,1.25)	0.37	0.39
	Stomach(N=37)
	HR(95%CI)	Pvalue	HR(95%CI)	Pvalue
AL	1.34(1.12,1.61)	<0.01	1.10(0.90,1.34)	0.36	0.52
ProAL50(per SD)	1.83(1.33,2.52)	<0.001	1.22(0.83,1.78)	0.31	0.39
Model1:adjusted age,gender,race,edu,income,Townsend, employment, smoke,alcohol, physical activity, and sleep

## Sheet: TS7-GO Process
term.ID	term.description	observed.gene.count	background.gene.count	strength	signal	false.discovery.rate
GO:0034369	Plasma lipoprotein particle remodeling	6	29	1.88	1.72	4.66e-06
GO:0097006	Regulation of plasma lipoprotein particle levels	7	54	1.67	1.65	4.66e-06
GO:0032501	Multicellular organismal process	39	6490	0.34	0.47	1.14e-05
GO:0010743	Regulation of macrophage derived foam cell differentiation	5	31	1.77	1.31	8.75e-05
GO:0050727	Regulation of inflammatory response	10	371	0.99	0.93	0.00012
GO:0048584	Positive regulation of response to stimulus	21	2131	0.56	0.59	0.00013
GO:0048518	Positive regulation of biological process	36	6207	0.33	0.42	0.00018
GO:0048731	System development	28	3867	0.42	0.48	0.00018
GO:0048583	Regulation of response to stimulus	28	3931	0.41	0.47	0.00024
GO:0042632	Cholesterol homeostasis	6	89	1.39	1.07	0.00025

## Sheet: TS-8GO Function
term.ID	term.description	observed.gene.count	background.gene.count	strength	signal	false.discovery.rate
GO:0071813	Lipoprotein particle binding	6	28	1.89	1.84	1.96e-06
GO:0005509	Calcium ion binding	13	717	0.82	0.81	9.69e-05
GO:0019838	Growth factor binding	7	127	1.3	1.14	9.69e-05
GO:0005102	Signaling receptor binding	17	1499	0.62	0.61	0.00028
GO:0030169	Low-density lipoprotein particle binding	4	17	1.93	1.19	0.00028
GO:0005488	Binding	49	12838	0.14	0.25	0.011
GO:0030545	Signaling receptor regulator activity	9	552	0.77	0.49	0.0118
GO:0008241	Peptidyl-dipeptidase activity	2	2	2.56	0.57	0.024
GO:0120020	Cholesterol transfer activity	3	23	1.68	0.55	0.024
GO:0005539	Glycosaminoglycan binding	6	245	0.95	0.47	0.0242

## Sheet: TS9-GO Component
term.ID	term.description	observed.gene.count	background.gene.count	strength	signal	false.discovery.rate
GO:0005615	Extracellular space	38	3247	0.63	0.99	5.46e-15
GO:0005576	Extracellular region	41	4175	0.55	0.86	1.52e-14
GO:0034358	Plasma lipoprotein particle	7	38	1.83	2.36	2.18e-08
GO:0009986	Cell surface	17	894	0.84	1.13	5.36e-08
GO:0005788	Endoplasmic reticulum lumen	11	312	1.11	1.42	2.82e-07
GO:0034364	High-density lipoprotein particle	5	29	1.8	1.62	8.47e-06
GO:0031982	Vesicle	25	3957	0.36	0.38	0.0031
GO:0034361	Very-low-density lipoprotein particle	3	20	1.74	0.73	0.0067
GO:0071944	Cell periphery	31	6015	0.27	0.32	0.007
GO:1990666	PCSK9-LDLR complex	2	2	2.56	0.75	0.007

[truncated: 4 more sheets: TS10-KEGG, TS11-Reactome, TS12-WikiPathways, TS13. UKB disease codes]
